# Supplementary material for: Exploring the effect of Brønsted acidity of MFI-type zeolites on catalytic cracking temperature of low density polyethylene
Source: Royal Society of Chemistry journal article supplement (doi:10.1039/d3cy01622f), 2024-01-01
Supplement: d3cy01622f1.pdf [file d3cy01622f1.pdf]

## **Supplementary Information**

## Supplementary tables and figures

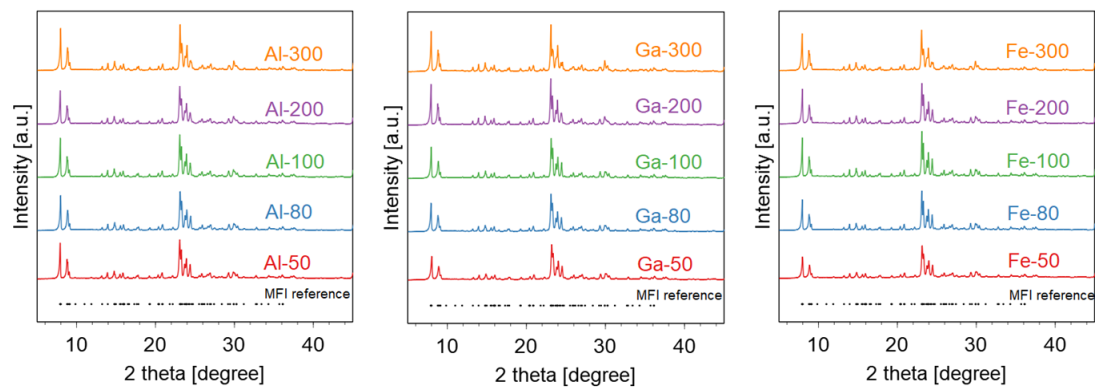

**Fig. S1.** The XRD patterns of each sample.

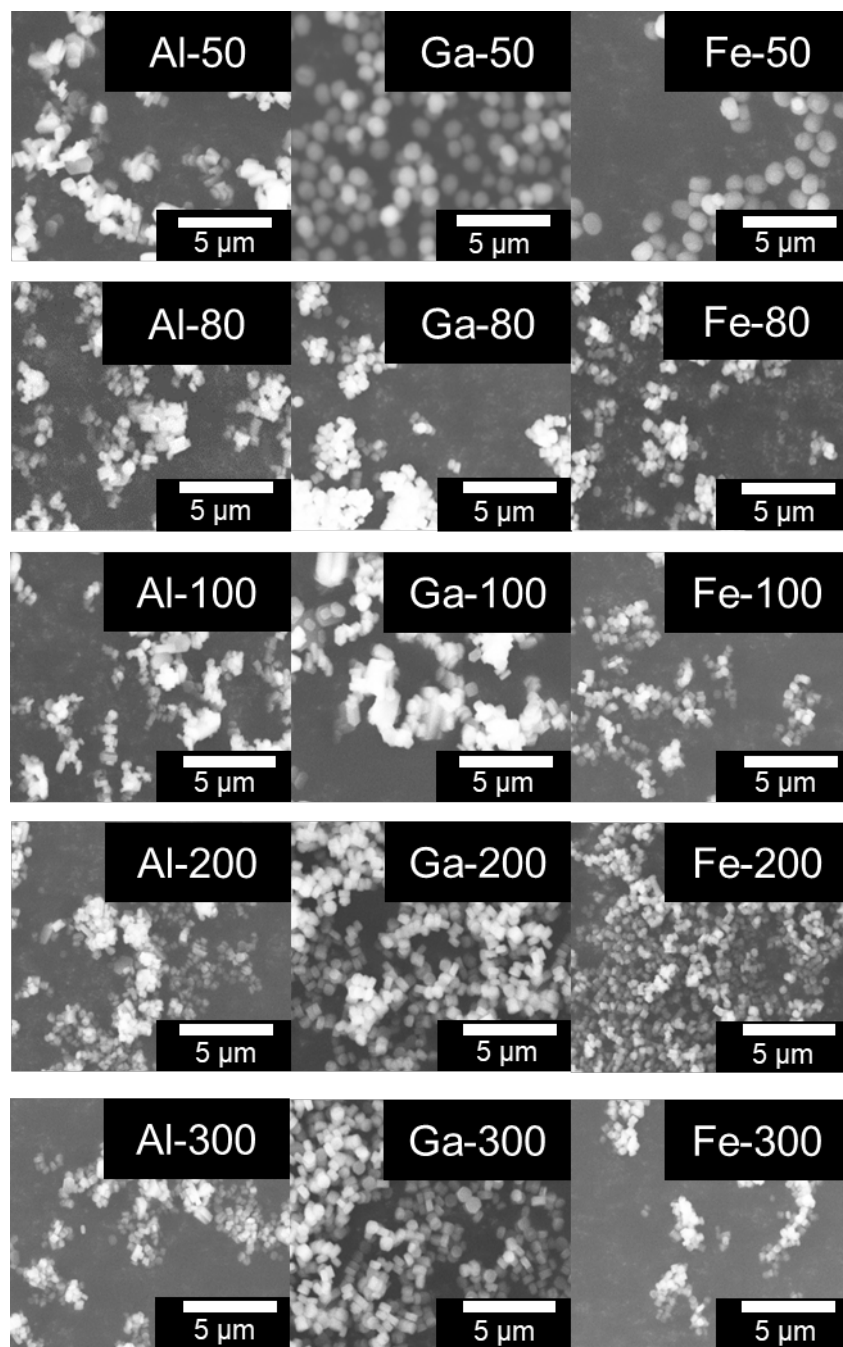

**Fig. S2.** SEM images of each sample.

**Table S1.** EDX analysis results of each sample.

| Si/T ratios [-] |       |       |       |
|-----------------|-------|-------|-------|
| gel             | Fe    | Al    | Ga    |
| 50              | 29.3  | 38.5  | 28.4  |
| 80              | 59.6  | 48.6  | 52.3  |
| 100             | 67.6  | 59.3  | 74.1  |
| 200             | 141.1 | 78.2  | 119.3 |
| 300             | 237.7 | 117.7 | 227.3 |

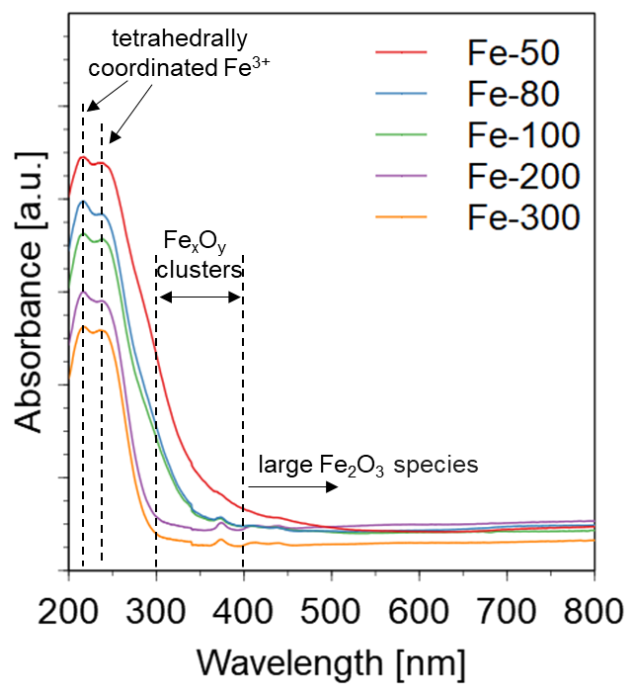

**Fig. S3.** UV spectra of each sample with Fe introduced.

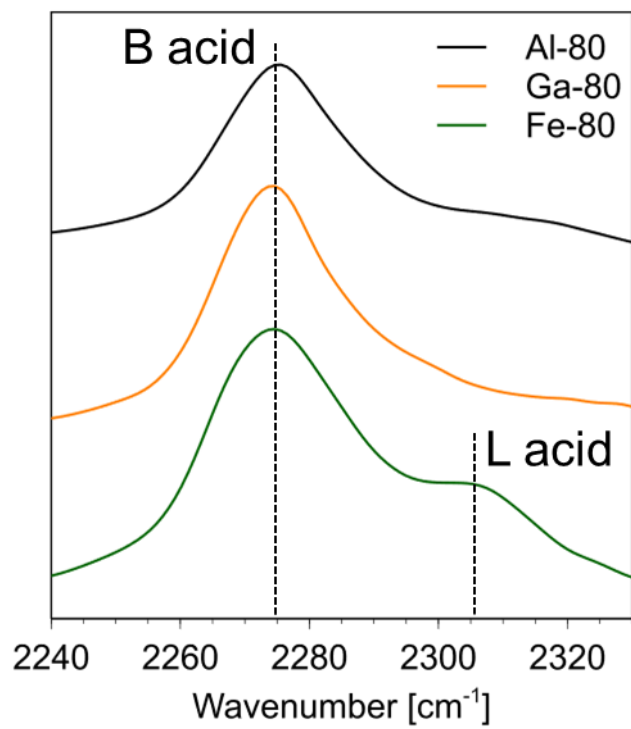

**Fig. S4.** FT-IR spectra of each sample.

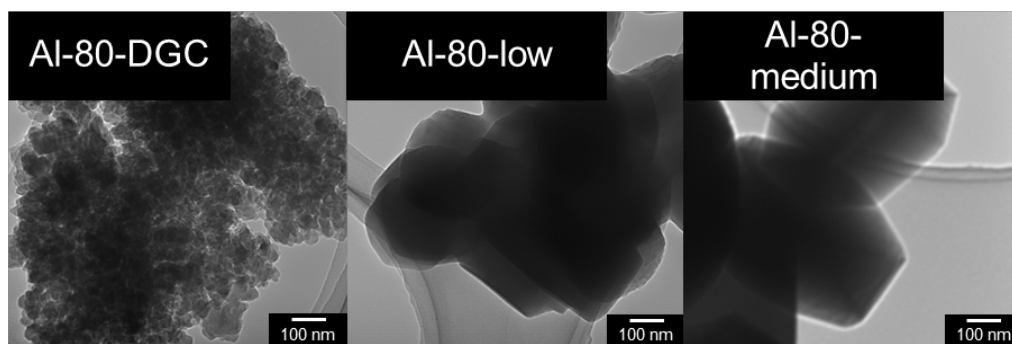

**Fig. S5.** TEM images of MFI zeolites with different particle sizes.

**Table. S2** Si/Al, acid amount and  $T_{\text{half}}$  of particle size modified MFI zeolite.

| samples                                 | Al-80-DGC | Al-80-low | Al-80-medium |
|-----------------------------------------|-----------|-----------|--------------|
| External surface<br>[m <sup>2</sup> /g] | 91.0      | 62.6      | 24.6         |
| Si/Al ratio [-]                         | 64.3      | 64.2      | 73.4         |
| Acid amount<br>[mol/g]                  | 0.048     | 0.045     | 0.049        |
| $T_{\text{half}}$ [°C]                  | 331       | 375       | 400          |



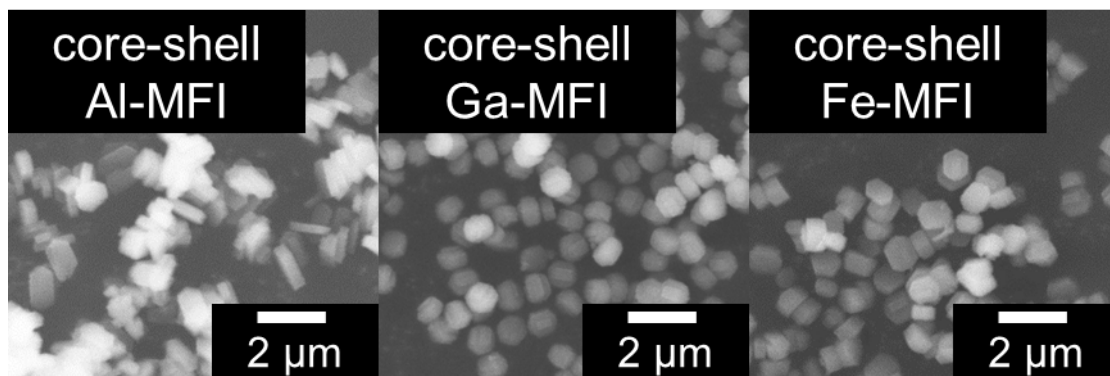

**Fig. S6.** SEM images of core-shell zeolites coated with Al-MFI, Ga-MFI, and Fe-MFI by silicalite-1.

**Table S3.** EDX analysis results of uncoated and core-shell samples.

| T  | Si/T ratios [-] |            |
|----|-----------------|------------|
|    | core            | core-shell |
| Al | 48.6            | 72.6       |
| Ga | 52.3            | 75.6       |
| Fe | 59.6            | 70.3       |
